# Supplementary material for: Carbon nanotube/Prussian blue nanocomposite film as a new electrode material for environmental treatment of water samples
Source: Royal Society of Chemistry journal article supplement (doi:10.1039/c3ra40397a), 2013-01-01
Supplement: c3ra40397a.pdf [file c3ra40397a.pdf]

## Supporting information

# Carbon Nanotube/Prussian Blue Nanocomposite Film as a New Electrode Material for Environmental Treatment of Water Samples

*Edson Nossol<sup>1,2</sup>, Arlene B. S. Nossol<sup>1</sup>, Aldo J. G. Zarbin<sup>2\*</sup> and Alan M. Bond<sup>1\*</sup>*

<sup>1</sup>School of Chemistry, Monash University, Clayton, Vic 3800, Australia

<sup>2</sup>Departamento de Química, Universidade Federal do Paraná (UFPR), CP 19081, CEP 81531-990, Curitiba-PR-Brazil.

Competitive reactions that can also occur affecting the total Fenton process:

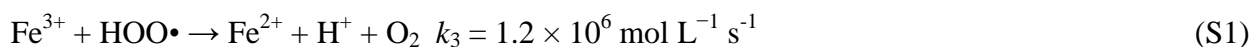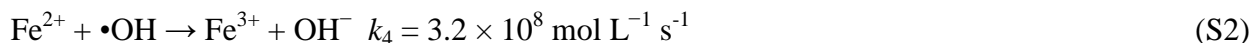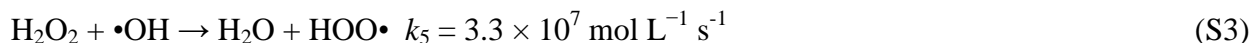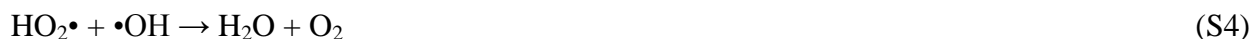

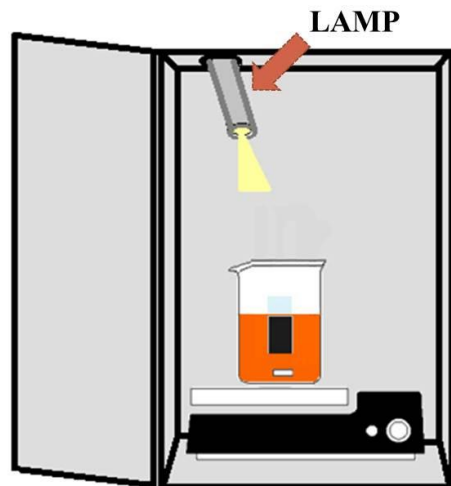

Figure S1. Experimental setup for photochemical-Fenton (PF) process

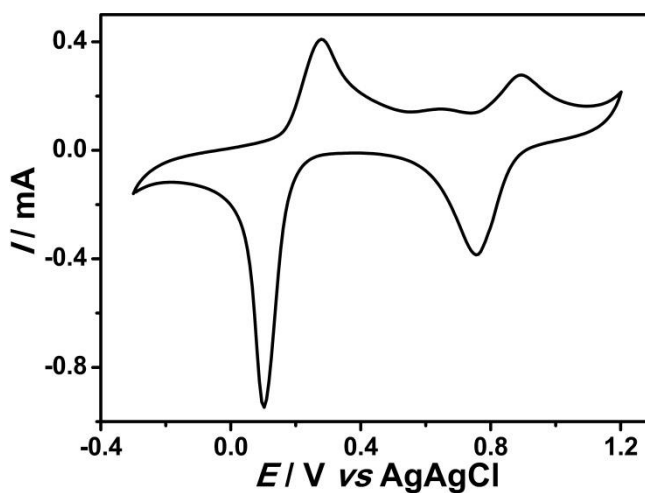

Figure S2. Cyclic voltammogram obtained for a CNT/PB film in a  $0.1 \text{ mol L}^{-1}$  KCl aqueous solution with a scan rate of  $50 \text{ mV s}^{-1}$ .

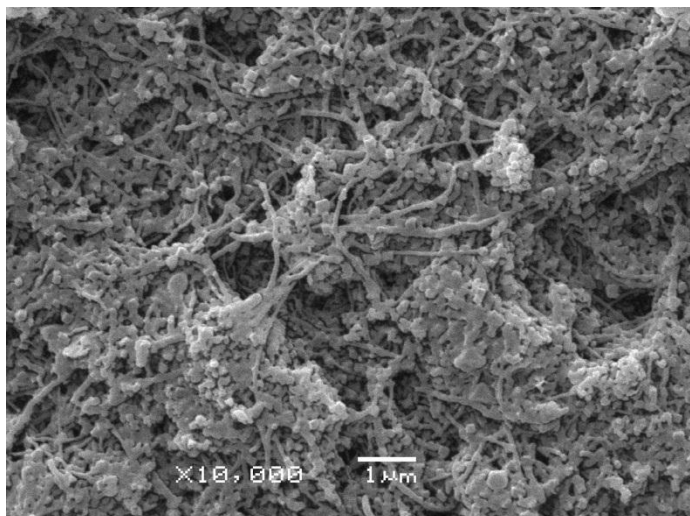

Figure S3. Scanning electron microscopy image obtained from the CNT/PB film.

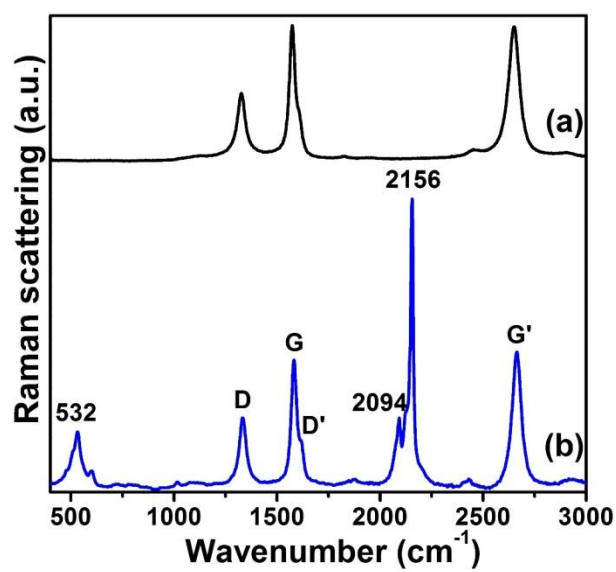

Figure S4. Raman spectra ( $\lambda = 632.8$  nm) of the CNT (a) and CNT/PB film (b).

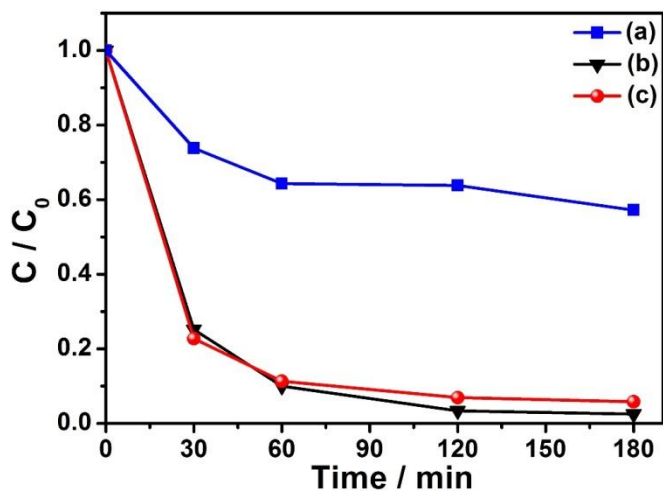

Figure S5. Influence of KCl concentration (a) 0.05, (b) 0.1 and (c) 0.2 mol L<sup>-1</sup> on MO degradation using a PEF process.

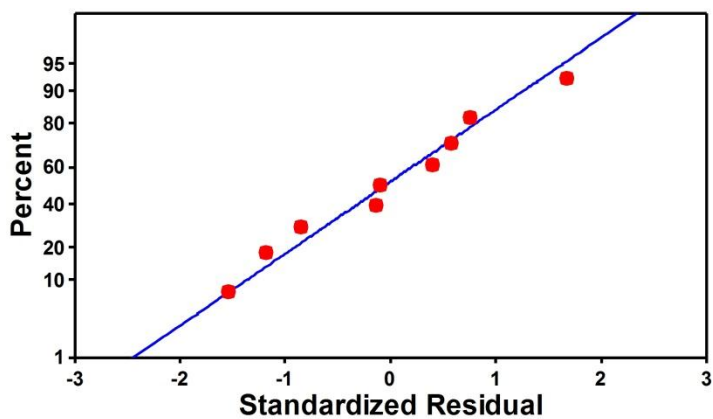

Figure S6. Normal probability plot of residuals *versus* MO degradation percentages.

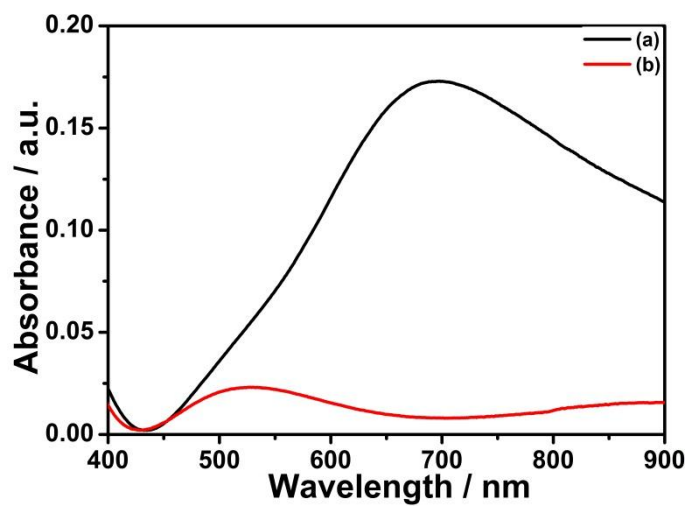

Figure S7. UV-Vis spectra derived from a PB film on ITO before (a) and after (b) MO degradation using a PEF process.
